# Supplementary material
Source: publisher site journal article supplement (https://www.spandidos-publications.com/4040/downloadSupplementary)
Supplement: Supplementary file 1 [file downloadSupplementary]

## Sheet: 1 - Fusion gene EWSR1-ERG
Table SI. STAR_Fusion confirms the EWSR1-ERG fusion gene.
The table shows the STAR_Fusion results of the CADO samples.
All known fusion genes were considered (based on the CTAT_HumanFusionLib database).
All parameters were left to the given, reasonable defaults.
The read BAM files used here are the same ones as utilized for the alternative splicing approach with rMATS.
Legend
#FusionName	The fusion partners
JunctionReadCount	The column indicates the number of RNA-Seq fragments containing a read that aligns as a split read at the site of the putative fusion junction
SpanningFragCount	The column indicates the number of RNA-Seq fragments that encompass the fusion junction such that one read of the pair aligns to a different gene than the other paired-end read of that fragment
est_J	Simulation estimates for junction read count
est_S	Simulation estimates for spanning fragments read count
SpliceType	indicates whether the proposed breakpoint occurs at reference exon junctions as provided by the reference transcript structure annotations (ex. gencode)
LeftGene	Information for the left partner
LeftBreakpoint	Genome position
RightGene	Information for the left partner
RightBreakpoint	Genome position
JunctionReads	Junction reads header
SpanningFrags	Spanning fragments read header
LargeAnchorSupport	The column indicates whether there are split reads that provide 'long' (set to length of 25 bases) alignments on both sides of the putative breakpoint
FFPM	Fusion fragments per million total reads
LeftBreakDinuc	Dinucleotide - SF constructs a fusion transcript by randomly fusing a pair of exons randomly selected from each gene, requiring that each gene contributes at least 100 bases of transcript sequence to the generated fusion, and that the fusion breakpoint occurs between two exons that have consensus dinucleotide splice sites
LeftBreakEntropy	represent the Shannon entropy of the 15 exonic bases flanking the breakpoint. The maximum entropy is 2, representing highest complexity. The lowest would be zero (involving a 15 base mononucleotide run). Low entropy sites should generally be treated as less confident breakpoints
RightBreakDinuc	Dinucleotide - SF constructs a fusion transcript by randomly fusing a pair of exons randomly selected from each gene, requiring that each gene contributes at least 100 bases of transcript sequence to the generated fusion, and that the fusion breakpoint occurs between two exons that have consensus dinucleotide splice sites
RightBreakEntropy	represent the Shannon entropy of the 15 exonic bases flanking the breakpoint. The maximum entropy is 2, representing highest complexity. The lowest would be zero (involving a 15 base mononucleotide run). Low entropy sites should generally be treated as less confident breakpoints
annots	provides a simplified annotation for fusion transcripts. The fusion annotation information is based on CTAT_HumanFusionLib.
Considered samples: SP2,SP3, NSP2,NSP3, nso2,nso3, nst2,nst3.
A second, independent approach with ‘deFuse’ is supporting EWSR1-ERG in SP2, SP3, NSP2, nso2, nst3 samples.
In the table below all STAR_Fusion generated hits are show.
sample	#FusionName	JunctionReadCount	SpanningFragCount	est_J	est_S	SpliceType	LeftGene	LeftBreakpoint	RightGene	RightBreakpoint	JunctionReads	SpanningFrags	LargeAnchorSupport	FFPM	LeftBreakDinuc	LeftBreakEntropy	RightBreakDinuc	RightBreakEntropy	annots
SP2	EWSR1--ERG	9	8	9	8	ONLY_REF_SPLICE	EWSR1^ENSG00000182944.17	chr22:29287134:+	ERG^ENSG00000157554.19	chr21:38392444:-	557_152_449_FC2_Lane05_Library17,379_17_1586_FC1_Lane02_Library17,356_60_1135_FC1_Lane01_Library17,45_705_1185_FC2_Lane05_Library17,311_252_1097_FC1_Lane04_Library17,138_103_2018_FC2_Lane06_Library17,638_897_1762_FC2_Lane01_Library17,585_1066_1812_FC2_Lane05_Library17,334_2027_1580_FC1_Lane02_Library17	269_1851_132_FC1_Lane01_Library17,311_1838_474_FC1_Lane04_Library17,57_1682_1811_FC1_Lane02_Library17,692_684_1551_FC1_Lane03_Library17,545_1479_256_FC1_Lane02_Library17,111_635_488_FC2_Lane03_Library17,256_729_1788_FC2_Lane04_Library17,398_328_1688_FC1_Lane05_Library17	YES_LDAS	0.149	GT	1.8062	AG	1.9086	["ChimerKB","ChimerPub","Cosmic","Mitelman","ChimerSeq","chimerdb_pubmed","CCLE_StarF2019","chimerdb_omim","INTERCHROMOSOMAL[chr22--chr21]"]
SP3	EWSR1--ERG	3	7	3	7	ONLY_REF_SPLICE	EWSR1^ENSG00000182944.17	chr22:29287134:+	ERG^ENSG00000157554.19	chr21:38392444:-	122_300_95_FC1_Lane03_Library21,698_1786_568_FC2_Lane04_Library21,53_1052_612_FC2_Lane06_Library21	432_873_776_FC2_Lane01_Library21,249_1593_310_FC2_Lane06_Library21,124_1672_708_FC2_Lane02_Library21,393_1528_836_FC1_Lane06_Library21,307_383_1258_FC2_Lane01_Library21,391_54_1607_FC1_Lane01_Library21,402_1617_475_FC1_Lane02_Library21	YES_LDAS	0.1076	GT	1.8062	AG	1.9086	["ChimerKB","ChimerPub","Cosmic","Mitelman","ChimerSeq","chimerdb_pubmed","CCLE_StarF2019","chimerdb_omim","INTERCHROMOSOMAL[chr22--chr21]"]
NSP2	EWSR1--ERG	6	17	6	17	ONLY_REF_SPLICE	EWSR1^ENSG00000182944.17	chr22:29287134:+	ERG^ENSG00000157554.19	chr21:38392444:-	110_1014_1517_FC1_Lane05_Library18,11_1902_113_FC2_Lane02_Library18,688_22_1135_FC2_Lane05_Library18,411_617_1152_FC2_Lane06_Library18,217_114_1418_FC1_Lane02_Library18,425_1798_473_FC2_Lane04_Library18	108_1727_338_FC2_Lane06_Library18,365_214_34_FC2_Lane04_Library18,365_518_690_FC2_Lane02_Library18,670_470_1610_FC2_Lane05_Library18,393_1218_236_FC2_Lane03_Library18,327_904_865_FC2_Lane01_Library18,585_1199_769_FC2_Lane05_Library18,300_893_851_FC2_Lane06_Library18,207_706_25_FC2_Lane05_Library18,541_328_1205_FC2_Lane02_Library18,339_354_1101_FC1_Lane05_Library18,215_1868_1142_FC1_Lane06_Library…	YES_LDAS	0.2212	GT	1.8062	AG	1.9086	["ChimerKB","ChimerPub","Cosmic","Mitelman","ChimerSeq","chimerdb_pubmed","CCLE_StarF2019","chimerdb_omim","INTERCHROMOSOMAL[chr22--chr21]"]
NSP3	EWSR1--ERG	11	8	11	8	ONLY_REF_SPLICE	EWSR1^ENSG00000182944.17	chr22:29287134:+	ERG^ENSG00000157554.19	chr21:38392444:-	110_1783_1238_FC2_Lane05_Library22,472_605_1952_FC2_Lane02_Library22,707_1101_566_FC2_Lane03_Library22,650_531_1153_FC1_Lane01_Library22,234_1561_1502_FC1_Lane03_Library22,533_319_249_FC2_Lane05_Library22,383_1782_1556_FC1_Lane04_Library22,243_1077_1383_FC2_Lane02_Library22,31_1611_1057_FC2_Lane03_Library22,179_1135_1949_FC2_Lane01_Library22,200_1382_239_FC2_Lane03_Library22	188_279_1260_FC2_Lane04_Library22,644_483_1098_FC1_Lane03_Library22,303_1786_1517_FC1_Lane02_Library22,76_1904_1222_FC1_Lane06_Library22,274_1385_1386_FC2_Lane04_Library22,138_291_1461_FC2_Lane04_Library22,620_1931_810_FC1_Lane02_Library22,682_589_704_FC2_Lane03_Library22	YES_LDAS	0.1577	GT	1.8062	AG	1.9086	["ChimerKB","ChimerPub","Cosmic","Mitelman","ChimerSeq","chimerdb_pubmed","CCLE_StarF2019","chimerdb_omim","INTERCHROMOSOMAL[chr22--chr21]"]
nso2	EWSR1--ERG	11	8	11	8	ONLY_REF_SPLICE	EWSR1^ENSG00000182944.17	chr22:29287134:+	ERG^ENSG00000157554.19	chr21:38392444:-	346_49_1169_FC1_Lane06_Library20,199_331_751_FC2_Lane04_Library20,638_1156_292_FC2_Lane03_Library20,179_1881_1445_FC1_Lane02_Library20,173_908_1206_FC2_Lane04_Library20,458_1306_1420_FC1_Lane04_Library20,351_1133_972_FC1_Lane03_Library20,510_348_1545_FC1_Lane04_Library20,20_37_286_FC2_Lane04_Library20,59_1975_716_FC1_Lane01_Library20,229_1637_1831_FC2_Lane05_Library20	445_1341_1118_FC2_Lane01_Library20,304_357_695_FC2_Lane06_Library20,638_1589_1257_FC1_Lane01_Library20,700_142_591_FC2_Lane03_Library20,383_727_454_FC2_Lane04_Library20,162_932_41_FC2_Lane04_Library20,89_1749_459_FC2_Lane03_Library20,396_186_986_FC1_Lane06_Library20	YES_LDAS	0.2147	GT	1.8062	AG	1.9086	["ChimerKB","ChimerPub","Cosmic","Mitelman","ChimerSeq","chimerdb_pubmed","CCLE_StarF2019","chimerdb_omim","INTERCHROMOSOMAL[chr22--chr21]"]
nst2	EWSR1--ERG	17	25	17	25	ONLY_REF_SPLICE	EWSR1^ENSG00000182944.17	chr22:29287134:+	ERG^ENSG00000157554.19	chr21:38392444:-	227_466_978_FC2_Lane01_Library19,52_634_809_FC1_Lane04_Library19,410_91_1183_FC1_Lane03_Library19,140_800_392_FC2_Lane02_Library19,442_1082_618_FC2_Lane05_Library19,197_1793_1194_FC2_Lane04_Library19,95_881_1204_FC2_Lane03_Library19,327_1826_263_FC2_Lane01_Library19,48_1194_1686_FC2_Lane02_Library19,447_452_822_FC2_Lane06_Library19,433_480_44_FC1_Lane06_Library19,280_776_437_FC1_Lane02_Library19,…	101_1420_1133_FC2_Lane04_Library19,409_1887_1158_FC1_Lane02_Library19,352_230_956_FC1_Lane03_Library19,400_1069_998_FC2_Lane05_Library19,136_1890_1020_FC1_Lane03_Library19,260_1657_1539_FC1_Lane02_Library19,75_1287_421_FC2_Lane04_Library19,51_1276_400_FC1_Lane05_Library19,537_1510_356_FC2_Lane02_Library19,497_967_1272_FC2_Lane05_Library19,46_1882_1810_FC2_Lane02_Library19,151_1186_1826_FC1_Lane05…	YES_LDAS	0.3773	GT	1.8062	AG	1.9086	["ChimerKB","ChimerPub","Cosmic","Mitelman","ChimerSeq","chimerdb_pubmed","CCLE_StarF2019","chimerdb_omim","INTERCHROMOSOMAL[chr22--chr21]"]
further, weaker and maybe false positive, hits
nso2	TUBA1C--NOP56	3	6	3	6	INCL_NON_REF_SPLICE	TUBA1C^ENSG00000167553.15	chr12:49273277:+	NOP56^ENSG00000101361.17	chr20:2654209:+	44_1078_1642_FC1_Lane03_Library20,44_1075_1643_FC1_Lane03_Library20,204_538_141_FC1_Lane05_Library20	392_438_1332_FC2_Lane04_Library20,85_1007_1402_FC1_Lane06_Library20,671_685_1709_FC2_Lane01_Library20,276_1627_727_FC1_Lane05_Library20,415_320_521_FC2_Lane05_Library20,583_1780_1116_FC1_Lane05_Library20	YES_LDAS	0.1017	GT	1.5546	AG	1.9086	["INTERCHROMOSOMAL[chr12--chr20]"]
nst2	SNORD3B-1--RMRP	3	170	3	136.76	INCL_NON_REF_SPLICE	SNORD3B-1^ENSG00000265185.5	chr17:19062123:+	RMRP^ENSG00000269900.3	chr9:35658023:-	300_926_1187_FC2_Lane01_Library19,53_1294_769_FC1_Lane03_Library19,229_889_1456_FC2_Lane05_Library19	188_937_389_FC1_Lane05_Library19,443_747_1340_FC2_Lane06_Library19,472_1827_905_FC2_Lane06_Library19,304_1370_333_FC1_Lane03_Library19,405_139_1797_FC2_Lane06_Library19,421_615_1720_FC2_Lane02_Library19,80_411_658_FC1_Lane01_Library19,442_1618_338_FC2_Lane01_Library19,527_1467_1924_FC2_Lane04_Library19,323_765_1400_FC2_Lane04_Library19,622_1171_42_FC2_Lane04_Library19,353_1422_84_FC1_Lane02_Libra…	NO_LDAS	1.2553	GT	1.8892	AG	1.7819	["INTERCHROMOSOMAL[chr17--chr9]"]

## Sheet: 2 - rMATS basic counts
Table SI. rMATS FDR corrected result counts.
The table gives an general overview on the numbers of all significant rMATS results (FDR<0.05) per sample comparison.
The number is indicating splice variants and not genes.
The column termed ‘label’ is indicating an acronym used throughout to identify a specific sample comparison.
Group 1 and Group 2 are explicitly describing the comparison and the number of biological replicates behind the sample entity.
						JC							JCEC							rMATS results, FDR < 0.05
											Row Sum							Row Sum		Differential splice variant analysis : group 1 versus group 2
	Label		Group 1	Group 2		A3SS	A5SS	MXE	RI	SE			A3SS	A5SS	MXE	RI	SE			JC : Junction counts
																				JCEC : Junction and adjacent exon counts
	C1		NSP 1-3	nst 1-3		46	28	6	69	201	350		77	58	32	215	527	909		A3SS, A5SS, MXE, RI, SE : analyzed splice events
	C2		NSP 1-3	nso 1-3		37	27	7	36	152	259		66	38	46	81	386	617
	B		SP 1-3	NSP 1-3		33	16	10	33	93	185		59	41	65	139	302	606		SP : side population of whole Ewing sarcoma cell population
	D		SP 1-3	MSC 1-4		82	59	61	169	428	799		141	135	177	484	1024	1961		NSP : main Ewing sarcoma cell population (non side population)
	B2		NSP 1-3	MSC 1-4		97	86	61	238	536	1018		192	170	137	500	1199	2198		nst : main Ewing sarcoma cell population : not stained, not sorted (control)
	H1		SP 1-3	ES1 1		93	49	155	118	376	791		193	121	403	546	1186	2449		nso : main Ewing sarcoma cell population : stained, not sorted (control)
	H2		SP 1-3	ES2 1		128	65	155	189	548	1085		206	147	344	520	1341	2558
	G1		NSP 1-3	ES1 1		76	48	147	121	417	809		181	129	399	577	1294	2580		Numbers after the acronym : numbers of the replicates considered
	G2		NSP 1-3	ES2 1		172	94	164	216	731	1377		274	187	408	653	1657	3179
																				SP, NSP, nst, nso : own the EWSR1-ERG fusion gene
	E1		SP 1-3	huFIB 1-4		58	52	61	128	313	612		105	97	146	399	787	1534		ES 1 : owns the EWSR1-ERG fusion gene
	E2		NSP 1-3	huFIB 1-4		87	69	64	176	441	837		162	131	144	452	1053	1942		ES 2 : owns the EWSR1-FLI1 fusion gene
	E3		MSC 1-4	huFIB 1-4		58	34	40	53	257	442		108	71	84	197	541	1001
						967	627	931	1546	4493	8564		1764	1325	2385	4763	11297	21534
	BC		SP 1-3	NSP 1-3		15	7	7	20	48	97		30	21	41	62	150	304		B adjusted by C1, C2 is denoted by BC

## Sheet: 3 - rMATS sample variability
Table SI. Results for SP-NSP (B set) variability.
The variance in-between the biological replicates of a sample group is an important performance factor.
In this separate quality control study, four two by two combinations of SP and NSP, and the full three by three DS analysis were compared.
The final conclusion was to keep all replicates.
						JC							JCEC
	Label		Group 1	Group 2		A3SS	A5SS	MXE	RI	SE	Sum		A3SS	A5SS	MXE	RI	SE	Sum
	B		SP 1-3	NSP 1-3		33	16	10	33	93	185		59	41	65	139	302	606
		1	SP 12	NSP 13		55	36	35	78	233	437		92	74	75	200	606	1047		Additional B comparisons here
		2	SP 12	NSP 23		73	52	41	121	343	630		123	111	91	245	813	1383
		3	SP 13	NSP 12		69	22	54	95	216	456		127	98	165	348	662	1400
		4	SP 23	NSP 12		29	18	13	37	88	185		62	47	96	156	294	655
		sd				19.8914	15.4056	17.1148	35.255	104.464			30.3425	28.1957	39.8529	82.2896	218.12			sd : standard deviation

## Sheet: 4 - Unique splice sites
Table SI. How many unique genes and splice sites?
In a screening study on alternate splicing it worth to know, how much genes own more than one splice site.
This table is showing for every rMATS gene set (FDR<0.05) the uniqueness of sites and genes.
Nomenclature
JC: junction counts
JCEC: junction and adjacent exon counts
rMATS results: summary count over all splice events per set
unique sites: unique number of gene names bound to a certain splice site
unique genes: unique number of genes, not considering any site information
	JC						JCEC
Set label	rMATS results	unique splice sites		unique genes			rMATS results	unique splice sites		unique genes
			%		%				%		%
B	185	180	0.97	169	0.96		606	579	0.91	535	0.88
C1	350	344	0.98	321	0.97		909	879	0.92	808	0.89
C2	259	254	0.98	244	0.97		617	598	0.94	547	0.89
D	799	755	0.94	683	0.94		1961	1836	0.85	1608	0.82
B2	1018	962	0.94	862	0.94		2198	2069	0.85	1779	0.81
H1	791	755	0.95	691	0.93		2449	2277	0.87	1934	0.79
H2	1085	1037	0.96	942	0.95		2558	2430	0.87	2062	0.81
G1	809	760	0.94	685	0.92		2580	2383	0.85	2001	0.78
G2	1377	1317	0.96	1170	0.94		3179	2991	0.85	2488	0.78
E1	612	588	0.96	542	0.94		1534	1447	0.89	1260	0.82
E2	837	796	0.95	722	0.94		1942	1827	0.86	1566	0.81
E3	442	427	0.97	407	0.95		1001	950	0.92	876	0.88

## Sheet: 5 - rMATS subsets
Table SI. rMATS subsets.
The cell type specific splice variants (blue) and the differential-specific splice variants (yellow) are shown.
JC (junction count) is the approach of rMATS which is considering only reads across the junction,
while JCEC (junction and adjacent exon counts) is also considering reads on adjacent exons.
[1]	This table is extending Table 3 by the JCEC part.
					JC							JCEC
	Label		Alias		A3SS	A5SS	MXE	RI	SE	Sum		A3SS	A5SS	MXE	RI	SE	Sum
	“unique cell specific”
	SP'				3	1	1	5	21	31		5	6	14	25	56	106
	NSP'				3	2	2	6	11	24		7	7	6	16	37	73
	MSC'				24	29	21	77	177	328		58	69	48	225	441	841
	“unique differential”
	BC’		BCunique		8	4	4	6	16	38		17	7	16	10	45	95
	B2’		B2unique		60	53	33	141	319	606		113	86	62	223	641	1125
	D’		Dunique		49	28	36	76	203	392		66	57	82	205	449	859
[2]	The correction of set B by the two control sets C1 and C2
	While NSP is stained and sorted, the controls represent situations without staining and sorting (nst) and no sorting (nso).
	The idea was to intercept some of the experimental stress effects by excluding the DS effects of C1 (nst-NSP) and C2 (nso-NSP) from the B (SP-NSP) set.
	As can be seen, a relevant amount of variance could be removed by this procedure.
	B’ versus BC’
	BC’		BCunique		8	4	4	6	16	38		17	7	16	10	45	95
	B’		Bunique		13	5	7	9	28	62		23	10	20	24	82	159

## Sheet: 6 - External controls
Table SI. External controls - count distribution.
In this table the count distribution is presented of the external controls E1-E3 and their overlap to the adjacent sets (cf. Figure2).
All the overlaps are limited and have a similar set size.
rMATS counts
Description
i : intersection
u./u.2. : prefix of objects inside the R workspace
Adjacent sets			u.2.E1iBC	u.2.E1iD		u.2.E2iBC	u.2.E2iB2		u.2.E3iD	u.2.E3iB2
	JC		34	319		38	441		104	123
	JCEC		140	797		134	974		335	327
Base sets			u.E1			u.E2			u.E3
	JC		477			645			383
	JCEC		1095			1346			791
Base sets		u.BC	u.D	u.B2
	JC	91	614	769
	JCEC	276	1386	1515

## Sheet: 7 - GO and CORUM counts
Table SI. Counts of the GO and CORUM approaches.
The table shows the distribution of the gene counts, GO term counts, CORUM complex counts summarized over all splice events.
Cell type- (SP', NSP', MSC') and the differential-specific (BC', B2', D') splice event groups are shown.
All results are JC based results on a FDR < 0.05.
Unique gene sets (without overlap)	Input DS genes	GO terms with significant hits	CORUM complexes with significant hits
SP'	30	272	17
NSP'	23	119	59
MSC'	267	589	110
BC'	37	207	25		[SP-NSP]
B2'	532	526	65		[MSC-NSP]
D'	351	509	87		[SP-MSC]
